# Supplementary material for: Mechanism of HCS + O2 reaction: Hydrogen- or oxygen-transfer?
Source: Royal Society of Chemistry journal article supplement (doi:10.1039/b508904b), 2005-01-01
Supplement: b508904b.pdf [file b508904b.pdf]

**TABLE S1.** Harmonic vibrational frequencies and infrared intensities (in parentheses) of intermediates and transition states at the B3LYP/6-31G(d) level and BH&HLYP/6-311++G(d,p) level (in italics)

| <b>Species</b>                       | <b>Frequencies/cm<sup>-1</sup> and Infrared Intensities/km mol<sup>-1</sup></b>                                                                                                       |
|--------------------------------------|---------------------------------------------------------------------------------------------------------------------------------------------------------------------------------------|
| <b>C1</b>                            | 66(3) 91(0) 152(4) 192(1) 397(61) 843(119) 1200(107) 1578(187) 3092(31)<br><i>33(0) 37(0) 82(1) 88(1) 193(79) 875(85) 1255(27) 1800(1) 3213(4)</i>                                    |
| <b>C2</b>                            | 40(10) 85(0) 140(3) 243(52) 600(100) 1201(30) 1343(95) 1539(106) 3288(516)<br><i>41(3) 82(0) 129(4) 197(24) 555(132) 1275(42) 1430(80) 1591(28) 3622(805)</i>                         |
| <b>C3</b>                            | 141(2) 188(14) 221(10) 461(17) 705(55) 925(3) 1349(3) 1692(265) 2962(52)<br><i>52(2) 87(2) 91(29) 405(19) 705(105) 973(6) 1409(24) 1831(473) 3023(59)</i>                             |
| <b>C4</b>                            | 70(8) 108(0) 138(0) 339(86) 783(124) 947(3) 1335(8) 1653(105) 3058(39)<br><i>54(9) 54(3) 97(3) 389(24) 716(131) 982(3) 1405(25) 1828(480) 3045(45)</i>                                |
| <b>1</b>                             | 212(4) 270(1) 383(3) 866(15) 876(48) 1100(40) 1113(76) 1390(41) 3173(6)<br><i>213(6) 286(1) 717(3) 920(18) 940(56) 1157(41) 1211(230) 1448(46) 3253(2)</i>                            |
| <b>2</b>                             | 160(4) 336(5) 501(2) 901(15) 999(60) 1105(92) 1123(6) 1372(57) 3169(1)<br><i>159(4) 353(4) 525(2) 936(19) 1064(75) 1173(117) 1219(145) 1439(85) 3242(1)</i>                           |
| <b>3</b>                             | 86(0) 306(2) 482(7) 510(11) 860(67) 929(90) 991(67) 1130(22) 2696(2)<br><i>187(0) 324(1) 516(10) 539(11) 944(59) 982(85) 1104(192) 1196(53) 2785(3)</i>                               |
| <b>TSR/1</b>                         | <i>377i(108) 114(0) 151(2) 427(1) 483(47) 868(21) 1267(207) 1524(493) 3282(6)</i>                                                                                                     |
| <b>TSR/2</b>                         | <i>338i(146) 61(1) 128(2) 379(16) 433(38) 923(72) 1265(162) 1488(672) 3223(11)</i>                                                                                                    |
| <b>TSC1/C2</b>                       | 1270i(189) 123(8) 193(1) 433(13) 591(4) 930(59) 1259(264) 1366(110) 1645(40)<br><i>2556i(10149) 81(5) 161(1) 398(24) 604(4) 947(68) 1324(675) 1411(201) 1674(56)</i>                  |
| <b>TS1/2</b>                         | 235i(5) 282(5) 465(5) 838(42) 907(29) 1122(98) 1146(21) 1347(51) 3163(7)<br><i>212i(5) 332(4) 508(5) 907(36) 974(37) 1204(67) 1223(142) 1406(59) 3241(2)</i>                          |
| <b>TS1/C3</b>                        | 794i(841) 153(0) 238(14) 553(3) 827(6) 834(14) 1098(135) 1394(11) 2950(13)<br><i>193i(2) 159(0) 241(8) 457(10) 866(17) 908(12) 1216(91) 1304(203) 3007(58)</i>                        |
| <b>TS2/C2</b>                        | 1303i(42) 64(4) 76(0) 116(48) 648(101) 1113(32) 1255(399) 1368(101) 1702(17)<br><i>1405i(111) 127(1) 135(21) 479(130) 721(236) 1176(33) 1318(469) 1447(122)<br/>         1838(27)</i> |
| <b>TS2/C4</b>                        | 347i(97) 116(4) 194(1) 429(8) 894(4) 936(5) 1307(48) 1413(29) 3124(16)<br><i>724i(579) 83(3) 229(9) 351(61) 919(8) 963(14) 1194(59) 1355(62) 3207(16)</i>                             |
| <b>TS2/3</b>                         | 1733i(520) 144(0) 254(31) 303(2) 484(1) 936(213) 990(19) 1083(10) 1997(61)<br><i>1794i(459) 172(4) 222(25) 347(6) 521(2) 1055(33) 1073(380) 1144(17) 2124(99)</i>                     |
| <b>TSP<sub>2</sub>/P<sub>3</sub></b> | 1822i(172) 346(5) 456(3) 708(62) 1690(7) 1893(388)<br><i>1945i(195) 338(5) 495(3) 744(69) 1830(53) 1990(563)</i>                                                                      |
| <b>TSP<sub>2</sub>/P<sub>4</sub></b> | 921i(37) 539(5) 546(40) 589(2) 850(11) 2045(493)<br><i>1023i(72) 573(4) 577(41) 640(9) 886(20) 2131(807)</i>                                                                          |
